# Supplementary material
Source: PubMed Central journal article supplement (PMC1236575)

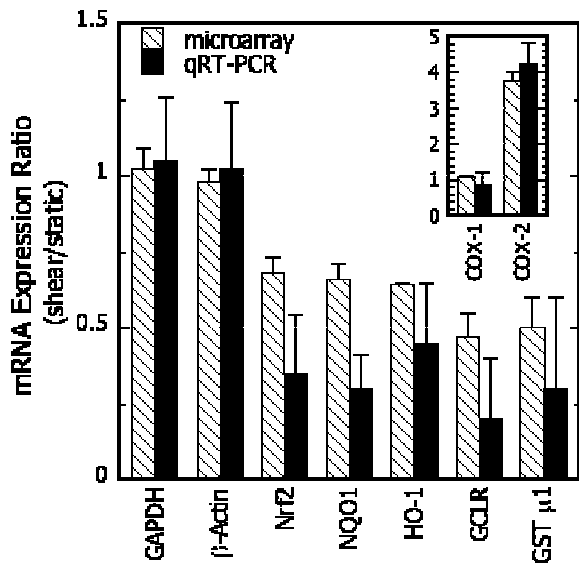

Supplement: pnas_0506620102_1.pdf [file pnas_0506620102_1.pdf]

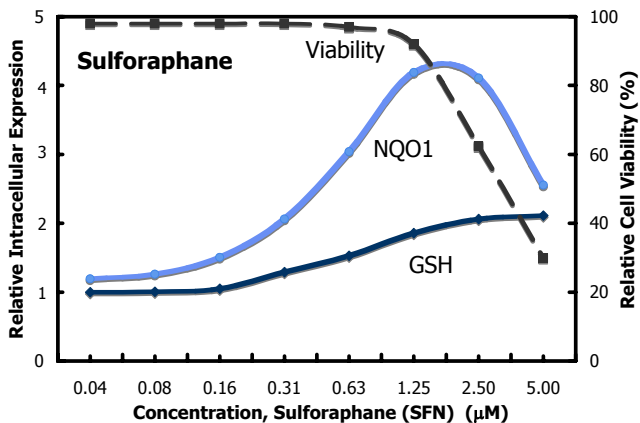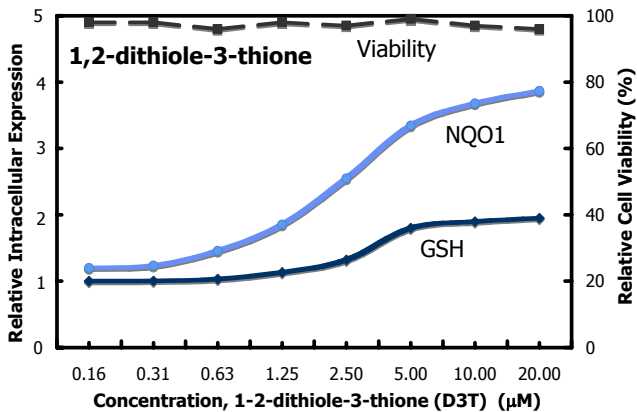

Supplement: pnas_0506620102_2.pdf [file pnas_0506620102_2.pdf]
